# Supplementary material for: Feasibility Study of Using Excess Sludge Fermentation Broth as a Co-Metabolic Carbon Source for 2,4,6-Trichlorophenol Degradation
Source: MDPI journal article supplement (doi:10.3390/w15224008), 2023-11-18
Supplement: s1 [file s1]

## Supplementary Material

# Feasibility study of using excess sludge fermentation broth as a co-metabolic carbon source for 2,4,6-Trichlorophenol degradation

Jianguang Wang <sup>1,2\*</sup>, Zhirong Sun <sup>1\*</sup>, Jun Li <sup>1</sup>

<sup>1</sup> National Engineering Laboratory for Advanced Municipal Wastewater Treatment and Reuse Technology, Beijing University of Technology, Beijing 100124, China

<sup>2</sup> PowerChina Huadong Engineering Corporation Limited, Hangzhou 311122, China

\* Correspondence: wjg909090@163.com (J.W.); zrsun@bjut.edu.cn (Z.S.)

Table S1: The DSBF Influent Trace Elements Concentrations

| Number | Trace elements                                      | Concentration(mg/L) |
|--------|-----------------------------------------------------|---------------------|
| 1      | ZnSO <sub>4</sub> ·7H <sub>2</sub> O                | 0.25                |
| 2      | MgSO <sub>4</sub> ·7H <sub>2</sub> O                | 12.0                |
| 3      | FeSO <sub>4</sub> ·7H <sub>2</sub> O                | 2.0                 |
| 4      | H <sub>3</sub> BO <sub>3</sub>                      | 0.3 µg/L            |
| 5      | CuSO <sub>4</sub> ·5H <sub>2</sub> O                | 0.06                |
| 6      | KI                                                  | 0.06                |
| 7      | MnSO <sub>4</sub> ·H <sub>2</sub> O                 | 0.24                |
| 8      | Na <sub>2</sub> MoO <sub>4</sub> ·2H <sub>2</sub> O | 0.12                |
